# Supplementary material for: Self-assembling functional programmable protein array for studying protein–protein interactions in malaria parasites
Source: Malar J. 2018 Jul 17;17:270. doi: 10.1186/s12936-018-2414-2 (PMC6050706; doi:10.1186/s12936-018-2414-2)
Supplement: Supplementary file 3 — Additional file 3: Table S1. List of primers used, amplicon size, expressed products’ molecular weight and destination vectors for the genes analysed. [file 12936_2018_2414_MOESM3_ESM.xlsx]

## Sheet: Primer List
	Table 1. List of primers used, amplicon size, molecular weight of expressed products and destination vectors of the genes analysed.
	ID	Sequence	Product	MW (kDa)	Destination vector
	PvMSP1-30-38F	AAA GCA GGCT TC GAA GGA GAT AGA ACC ATG GGACATCAAGCACAAGGTG	1767	64kDa	pANT7-cGST
	PvMSP1-30-38R	A GAA AGC TGG GTC TCC TTCCTCCCCGTCGTCATC
	PvRON2-RIIF	AAA GCA GGCT TC GAA GGA GAT AGA ACC ATG GGCAGGACGAGAAACAAAAG	2478pb	95kDa	pANT7-cGST
	PvRON2-RIIR	A GAA AGC TGG GTC TCC CAGCAGTTTCATCTTGGCC
	PvRON2-RIIIF	AAA GCA GGCT TC GAA GGA GAT AGA ACC ATG CTGGCCAAGATGAAACTGCT	1950pb	75kDa	pANT7-cGST
	PvRON2-RIIIR	A GAA AGC TGG GTC TCC CACCTGTATGCGGGCGTA
	PvAMA1-EctoF	AAA GCA GGCT TC GAA GGA GAT AGA ACC ATG CCTACCGTTGAGAGAAGCA	1335	52kDa	pANT7-cGST
	PvAMA1-EctoR	A GAA AGC TGG GTC TCC TAGTAGCATCTGCTTGTTCGA
	PvAMA1-EctoF	AAA GCA GGCT TC GAA GGA GAT AGA ACC ATG CCTACCGTTGAGAGAAGCA	1029	39kDa	pANT7-cGST
	PvAMA1-DI-DIIR	A GAA AGC TGG GTC TCC CTCCAGGTCTACTTCTTGTG
	PvMSP8F	AAA GCA GGCT TC GAA GGA GAT AGA ACC ATG GGAAACGTTAGCCCACCC	1317	49kDa	pANT7-cGST
	PvMSP8R	A GAA AGC TGG GTC TCC GTATATTCCGTCTCCCTCAAA
	PvMSP10F	AAA GCA GGCT TC GAA GGA GAT AGA ACC ATG GAATTGAATGGAACGGACGG	1290	46kDa	pANT7-cGST
	PvMSP10R	A GAA AGC TGG GTC TCC CGCCTGAGAACCCATGAC
	PvRON5-A-F	AAA GCA GGCT TC GAA GGA GAT AGA ACC ATG TTCTTCGAAAATATGATCACG	1434pb	111kDa	pANT7-cGST
	PvRON5-A-R	A GAA AGC TGG GTC TCC CCACACTTCCTTCGTCGT
	PvRON5-C-F	AAA GCA GGCT TC GAA GGA GAT AGA ACC ATG AACAGCATCCAGAGCATCTA	1974pb	75kDa	pANT7-cGST
	PvRON5-C-R	A GAA AGC TGG GTC TCC GGGTATCCTCGTGTGCAC
	PvRAMAF	AAA GCA GGCT TC GAA GGA GAT AGA ACC ATG TTCAAAAATGGAGTCAACACG	2070	77kDa	pANT7-cGST
	PvRAMAR	A GAA AGC TGG GTC TCC GCCGCTTGACTTTCCTCC
	PvRON4F	AAA GCA GGCT TC GAA GGA GAT AGA ACC ATG TTCAGGAAGCCAGACGCG	2196	80kDa	pANT7-cGST
	PvRON4R	A GAA AGC TGG GTC TCC AATGAGATTTTCCACTTCGTC
	PvRBP1a-RIF	AAA GCA GGCT TC GAA GGA GAT AGA ACC ATG GAGAAAACCAAAATAGATGAAAG	2628	100kDa	pANT7-cGST
	PvRBP1a-RIR	A GAA AGC TGG GTC TCC CTCTGACTCTTCCCAAAATG
	PvDBP-RIF	AAA GCA GGCT TC GAA GGA GAT AGA ACC ATG GAACGAACAATTGAAACCCTT	576pb	22kDa	pANT7-cGST
	PvDBP-RIR	A GAA AGC TGG GTC TCC ACAGTTTTTCATTACAGTATTTTG
	PvDBP-RIIF	AAA GCA GGCT TC GAA GGA GAT AGA ACC ATG ACGATCTCTAGTGCTATTATAAA	981pb	39kDa	pANT7-cGST
	PvDBP-RIIR	A GAA AGC TGG GTC TCC GTCCACATTTGTCACAACTTC
	PvDBP-RIII-VIF	AAA GCA GGCT TC GAA GGA GAT AGA ACC ATG ACAAATGTGGACAATGCTGC	1440	51kDa	pANT7-cGST
	PvDBP-RIII-VIR	A GAA AGC TGG GTC TCC CGTAAAGCACTTGTAGGATGG
	PvMSP5F	AAA GCA GGCT TC GAA GGA GAT AGA ACC ATG CGTCCCCTCGAGGTCTCC	1023	36kDa	pANT7-cGST
	PvMSP5R	A GAA AGC TGG GTC TCC AATGCACTTGTCCCCAAATAA
	PvMSP4F	AAA GCA GGCT TC GAA GGA GAT AGA ACC ATG ATTGCTGCCTGTATAAGACAT	657	22kDa	pANT7-cGST
	PvMSP4R	A GAA AGC TGG GTC TCC GGAAGCCAAAACAATAATCAC
	PvRAP2F	AAA GCA GGCT TC GAA GGA GAT AGA ACC ATG CATACTTGCACAAAAGAATTG	1083	42kDa	pANT7-cGST
	PvRAP2R	A GAA AGC TGG GTC TCC ATGTTCACGCATGTGACAATT
	PvRON1F	AAA GCA GGCT TC GAA GGA GAT AGA ACC ATG AAGTGGGGACATGCGCTG	2244	81kDa	pANT7-cGST
	PvRON1R	A GAA AGC TGG GTC TCC CCGGAAGAGGAACGCCC
	PvRBP1a-RIIF	AAA GCA GGCT TC GAA GGA GAT AGA ACC ATG TTTAAACAAATGTGCTCTTCAC	900	34kDa	pANT7-cGST
	PvRBP1a-RIIR	A GAA AGC TGG GTC TCC GCCGGTCATGTCATATTCCT
	PvRBP1a-RIIIF	AAA GCA GGCT TC GAA GGA GAT AGA ACC ATG TCGAGCGTGCTAAACAATGTA	1050	40 kDa	pANT7-cGST
	PvRBP1a-RIIIR	A GAA AGC TGG GTC TCC CCTTATCGCATTTAAAGACTC
	PvRBP1a-RIVF	AAA GCA GGCT TC GAA GGA GAT AGA ACC ATG AGCATTGTAGAGGGAGGCG	1764	68kDa	pANT7-cGST
	PvRBP1a-RIVR	A GAA AGC TGG GTC TCC CTCAATATCAACAAAAGAAACAT
	PvRhopH3F	AAA GCA GGCT TC GAA GGA GAT AGA ACC ATG GGA CAGGTGCTAGGGAGAGAATA	1737	67kDa	pANT7-cGST
	PvRhopH3R	A GAA AGC TGG GTC TCC GAACTTCTCGGAACCTTTATT
	PvTRAMPF	AAA GCA GGCT TC GAA GGA GAT AGA ACC ATG GGA AAAAGGCAAAATACCAACTACA	831	32kDa	pANT7-cGST
	PvTRAMPR	A GAA AGC TGG GTC TCC GATGGTAATTTTAAACGTTGAAG
	PvRAP1F	AAA GCA GGCT TC GAA GGA GAT AGA ACC ATG ACCAACCAGAACGAAGCGG	1896	70kDa	pANT7-cGST
	PvRAP1R	A GAA AGC TGG GTC TCC ATAGTTCTTTTTGTAGTGACCC
	PvMSP1-42F	AAAGCAGGCTTCGAAGGAGATAGAACCATGGACCAAGTAACAACGGGAG	1122pb	42kDa	pANT7-cGST
	PvMSP1-42R	AGAAAGCTGGGTCTCCAAAGAGTGGCTCAGAACCTT
	Pv41F	AAAGCAGGCTTCGAAGGAGATAGAACCATGGCACACGCAGAAGAACACAT	1095pb	41kDa	pANT7-cGST
	Pv41R	AGAAAGCTGGGTCTCCCTGGAAGGACTTGGCAACAA
	Pv12F	AAAGCAGGCTTCGAAGGAGATAGAACCATGACGTGCGATTTTAATG	930 pb	36kDa	pANT7-cGST
	Pv12R	AGAAAGCTGGGTCTCCGCCCTGCAGAACATTCGC
	PvARPF	AAAGCAGGCTTCGAAGGAGATAGAACCATGTGCAACACAAATGGGAAAAGTA	795 pb	28kDa	pANT7-cGST
	PvARPR	AGAAAGCTGGGTCTCCCACGCCAAACAGCTTCAGC
	PfMSP183F	AAA GCA GGCT TC GAA GGA GAT AGA ACC ATG GTAACACATGAAAGTTATCAAGA	897	33kDa	pANT7-cGST
	PfMSP183R	A GAA AGC TGG GTC TCC TTCTAAAACGCTTATTAAATTATG
	Pv12-HaloF	GGGGACAAGTTTGTACAAAAAAGCAGGCTCCACGTGCGATTTTAATG	930	36kDa	pJFT7-nHALO
	Pv12-HaloR	GGGGACCACTTTGTACAAGAAAGCTGGGTCCTAGCCCTGCAGAACATTCGC
